# Supplementary material for: Accurate detections of the heterozygous SNPs with minimal genomic data in rice and prediction of de novo spontaneous mutation rate
Source: Research Square preprint supplement (doi:10.21203/rs.3.rs-5684576/v1), 2025-04-17
Supplement: Supplementary file 1 [file afa29e60dd8bbb7543941abb.docx]

**Figure S1.**
Secondary reference formation.

Letters G, A, C, and T represent nucleotides. Two letters separated by a slash (e.g., N/N) indicate heterozygous variants, while two letters without a slash (NN) represent insertions. A dash (-) is used for deletions, an asterisk (*) marks an error, and N signifies an unknown nucleotide.

**Figure S2a.**

Sanger sequencing results for Nipponbare siblings (Nip1, Nip2, and Nip3)

**Figure S2a Continued**

**Figure S2a Continued**

**Figure S2a Continued**

**Figure S2a Continued**

**Figure S2a Continued**

**Figure S2a Concluded.**

**Figure S2b.**

Sanger sequencing results for Kitaake siblings (Kita1, and Kita2)

**Figure S2b. Continued**

**Figure S2b. Continued**

**Figure S2b. Concluded.**

**Figure S3**

HVs in Hinohikari parent and its three progenies showing unique HVs (novel HVs) under 5 repetitions.

**Figure S4.**

The distributions of 6899 HVs from Hinohikari parent along the genome

The genotype pattern of the adjacent SNP loci that should be linked have beenn checked on the genome segments labelled with red box and indicated by letters as observed in Fig S5

**Figure S5.**

Linked adjacent SNP loci indicating similar genotype pattern in the three progenies

The genome segments observed have the size of at least 0.5kb and these few observed segments marked in Fig S4

**Figure S6.**

The distributions of HVs along the whole genome. (a) is for Nip1, Nip2, Nip3, Kita1, and Kita2 where red is for unique in Nip1, blue for unique in Nip2, green for unique in Nip3, violet for unique in Kitaake1, and purple for unique in Kitaake2.
