# Supplementary material for: Accurate detections of the heterozygous SNPs with minimal genomic data in rice and prediction of de novo spontaneous mutation rate
Source: Research Square preprint supplement (doi:10.21203/rs.3.rs-5684576/v1), 2025-04-17
Supplement: Supplementary file 2 [file d23f2223a43206d9366cf981.docx]

**SUPPLEMENTAL MATERIALS**

Table S1: Quality attributes of sample sequence data for Nipponbare and Kitaake

|  | **Nip 1** | **Nip 2** | **Nip 3** | **Kita 1** | **Kita 2** | |
| --- | --- | --- | --- | --- | --- | --- |
| gDNA concentrations (ng/µL) | 60.1 | 108.9 | 123.0 | 175.1 | 136.7 | |
| gDNA quality (260/280 absorbance ratio) | 1.92 | 1.88 | 1.85 | 1.85 | 1.86 | |
| Number of Reads × 106 | 115.6 | 116.7 | 115.8 | 113.6 | 114.2 | |
| Total bases after trimming × 109 | 16.3 (96.51*a*) | 16.6 (96.21*a*) | 16.7 (96.54*a*) | 16.4 (96.55*a*) | 16.7 (96.49*a*) | |
| Mean Reads Length | 144.92 | 145.90 | 145.84 | 145.86 | 145.88 | |
| Paired Reads after trimming ×106 | 115.3 (99.68*b*) | 116.5 (99.59*b*) | 115.6 (99.71*b*) | 113.4 (99.87*b*) | | 113.9 (99.88*b*) | |
| Paired total bases × 109 | 17. 8 | 17.7 | 17.8 | 17.1 | 17.3 | |
| GC (%) | 45.31 | 44.99 | 43.98 | 44.05 | 44.44 | |
| AT (%) | 54.69 | 55.01 | 56.02 | 56.95 | 55.56 | |
| Q20 (%) | 97.88 | 97.27 | 96.93 | 97.12 | 97.05 | |
| Q30 (%) | 92.16 | 92.22 | 92.01 | 92.78 | 92.65 | |

*a*In the parenthesis is the percentage of good quality total bases remaining after trimming

*b*In the parenthesis is the percentage of of paired reads remaining after trimming.

Table S2: Quality attributes of sample sequence data for Hinohikari and its progenies

|  | **Hinohikari** | **Progeny 1** | **Progeny 2** | **Progeny 3** |
| --- | --- | --- | --- | --- |
| gDNA concentrations (ng/µL) | 112.6 | 58.5 | 97.0 | 113.1 |
| gDNA quality (260/280 absorbance ratio) | 1.87 | 1.88 | 1.86 | 1.85 |
| Number of reads × 106 | 118.5 | 106.9 | 112.7 | 114.8 |
| Total bases after trimming × 109 | 17.3 (96.32*a*) | 15.6 (96.26*a*) | 17.4 (96.23*a*) | 18.5 (96.88*a*) |
| Mean reads length | 145.86 | 145.87 | 145.82 | 145.84 |
| Paired reads after trimming × 106 | 117.9 (99.63*b*) | 106.4 (99.57*b*) | 112.3 (99.67*b*) | 114.1 (99.87*b*) |
| Paired total bases × 109 | 17. 2 | 15.5 | 17.3 | 18.3 |
| GC (%) | 44.51 | 44.01 | 45.31 | 46.21 |
| AT (%) | 55.49 | 55.99 | 54.69 | 53.79 |
| Q20 (%) | 97.84 | 97.13 | 96.66 | 97.43 |
| Q30 (%) | 91.36 | 91.41 | 90.96 | 93.51 |

*a*In the parenthesis is the percentage of good quality total bases remaining after trimming

*b*In the parenthesis is the percentage of of paired reads remaining after trimming.

**Table S3:** List of primers used for Sanger sequencing validating the sample-specific HVs in Nipponbare and Kitaake

| **HVs** | **Chrom:pos** | **Allele** | **Forward primer** | **Reverse primer** |
| --- | --- | --- | --- | --- |
| Nip1-Uniq1 | 1:924311 | T/C | GCCAGCAAATTCACAGTTTA | GCCATGTTTCTGTAGTGCTG |
| Nip1-Uniq4 | 2:24374379 | A/G | GTTTGTTGTGCTCGTGAGTC | AATGGAAAGTTGGAAGGTTG |
| Nip1-Uniq8 | 5:27159839 | C/A | TCAAGGCAAAAACCCTAGAC | CAGAACCACCACCTAGCTTA |
| Nip1-Uniq10 | 7:21178147 | G/A | AGCTTTGGTGTGTTGGTCCT | ACCCATTCGCATTGTGACCT |
| Nip1-Uniq12 | 9:3495569 | GT/T | GCTCACTGTCTTGCTGTCCT | GAGAGAGAGAAGCTGTGGGC |
| Nip1-Uniq14 | 11:1416759 | T/C | TTGGCACTTAGCTGACTCTG | CAATGTGAGGATGCTACTGC |
| Nip1-Uniq15 | 11:2576407 | G/GT | ACCATGGACGGATACCTCGA | CCAGTTACGGGCCTCACTTT |
| Nip1-Uniq16 | 11:16412332 | C/T | CTGCGTTCACCAGAATAATG | ATGTTGTCTTTCACGTCCCT |
| Nip2-Uniq1 | 1:34917487 | A/T | AGGACCATGGACCCATATAA | ACATGTTTCGATCCATCCTT |
| Nip2-Uniq2 | 1:34917579 | C/T | AGGACCATGGACCCATATAA | ACATGTTTCGATCCATCCTT |
| Nip2-Uniq3 | 3:16876681 | G/A | CCAGGTTACCTTGCTCCTTA | TCGAAGTGCTTGTCACGTAT |
| Nip2-Uniq4 | 4:20819741 | C/T | GATGGAGCCTATCAAGGAGA | AAGACCTCTTGCAACTCCAG |
| Nip2-Uniq6 | 6:10582141 | G/A | AGATGGCATCACTTTCCTGT | TGACTTCTTTGGGTCCAGAT |
| Nip2-Uniq7 | 8:19288594 | C/G | AAGGACTTGTTGGAAGGAGA | AGCTGAAAATCCATCAGGAC |
| Nip2-Uniq9 | 9:7081317 | G/A | CACATGCGTATGGTACGACT | GCACAATGATGTTGTATGGG |
| Nip2-Uniq10 | 10:1102312 | G/C | TTGAGGAACACCAAAGTTGT | CATGGAGAGTTGGGACTACC |
| Nip2-Uniq11 | 11:23412384 | T/C | ATGGAGATATCGCGGGCTTG | CAGAGGTGGTAGCACTGGTG |
| Nip2-Uniq13 | 12:25714599 | G/A | AATTTTATCGGCACTGTACG | TTCATAGCAAATCAAGAGCG |

**Table S3: Continued**

| **HVs** | **Chrom:pos** | **Allele** | **Forward primer** | **Reverse primer** |
| --- | --- | --- | --- | --- |
| Nip3-Uniq1 | 1:1950170 | C/CA | ATTTTGTATCACACCCCGTT | ACTTATTACGCGATTCACGG |
| Nip3-Uniq2 | 1:2515304 | T/C | AAGAAGAATCAAGGGTGCAG | CTGAGACCTCTCCTCTTTCG |
| Nip3-Uniq3 | 3:9431155 | T/G | GGCATATCCACGGATAAAAA | TAGAGCAAAAGATATGGCCC |
| Nip3-Uniq4 | 3:20697718 | A/G | GAAATGGGTTGGATGGCAGC | GCTGTCGACAGTGACTCCTC |
| Nip3-Uniq6 | 4:11340505 | C/T | GGGGGATTTAGGTTATTTTCACTTT | AATGCGTTAAACAATTTAAGCAACT |
| Nip3-Uniq7 | 4:11340513 | C/T | GGGGGATTTAGGTTATTTTCACTTT | AATGCGTTAAACAATTTAAGCAACT |
| Nip3-Uniq8 | 5:28684788 | C/T | ACACTTAGCCACGTTTAGCC | TTCGGTAGATTAGCGTGTCA |
| Nip3-Uniq9 | 6:25514274 | CT/C | TTTACCAGCTTGCAGTGGCT | GCACAACCTGGCGTATACGT |
| Nip_Com-1 | 1:34917473 | C/T | AGGACCATGGACCCATATAA | ACATGTTTCGATCCATCCTT |
| Nip_Com-3 | 6:20150076 | A/G | GCCACTATTGTTTAAAGCCC | TCTACCCGTGAGAGATCCAT |
| Nip_Com-4 | 10:3696155 | T/TA | TTAACACGCCACGGTCATGA | TTTGGATCGTGTGGTCTGCA |
| Nip_Com-5 | 1:2090811 | A/G | CTCGTGTACAACCCCGCTAG | ACGTGATCGATCAGTGCGTC |
| Nip_Com-8 | 5:1026569 | G/A | TCCTGCCTGATAGGTGGTAT | CCACATATCTCACCTGCAAA |
| Nip_Com-9 | 11:2619685 | G/A | GATGAGATTCCCAAACAAGC | ACATCTGTCTCCATCAACCC |
| Nip_Com-14 | 12:25700489 | A/G | CCCCTTCGTCGACAACATGA | CGTAGTGGAACCGTTTGGGA |
| Nip_Com-16 | 6:20152281 | C/G | CCAGCTAACATGATTTTGCAACC | AGCTCGGTATCTCTGAGGCT |
| Nip1-Nip2-1 | 2:8489119 | A/G | ATGGCCTGTGCAAGCAAATG | TACGGCTGTTTCGTCCTGTC |
| Nip1-Nip2-5 | 4:29202176 | G/A | TGGAGTTTGGAGCTTTGGCA | CCTGGAAGCACAGTGATGGT |

**Table S3: Concluded.**

| **HVs** | **Chrom:pos** | **Allele** | **Forward primer** | **Reverse primer** |
| --- | --- | --- | --- | --- |
| Nip1-Nip2-12 | 5:7664258 | G/A | AGGACTCGAGCTCTCAACCT | TGGAAAAGATGGTGTTCGCG |
| Nip1-Nip2-19 | 10:10196289 | T/C | ACACAATCCGGACAGATCGT | TGCGTTCTGTACAGACTGGG |
| Kita2-Uniq1 | 10:4344275 | C/G | TTGCACATACCTCTTAGCCA | TGATGATGGTCAGTAGCGAG |
| Kita2-Uniq3 | 10:12305062 | A/C | CATATGGATGCTCATTTCCA | TCCCCTAGTATGCTTGTTCC |
| Kita2-Uniq9 | 8:16561214 | T/A | AGTCAAGATGCTTGTGGGAT | AGCAAGAGAAAACCATCTGC |
| Kita1-Uniq1 | 2:7064113 | G/A | CTCATTCACATTGCATGGAT | GGAAACATCATGCCGTAATC |
| Kita1-Uniq2 | 2:11480722 | G/A | GCTGAAAGAAAGCACCGTCA | GCTGTTGTTGACCCAGGGAT |
| Kita1-Uniq3 | 3:5401129 | T/A | GTCAAGGGGAGTCCAACTGG | TCGCAAGTCTCAACGGTCAA |
| Kita1-Uniq4 | 3:29907284 | A/T | TGCCTTCGTGATGATGGGAG | GGACAAGTCCCCAAGCAAAT |
| Kita1-Uniq10 | 9:10399345 | G/A | AGAGGTAGACTCGGACATGC | AGCCGATCTATTGGTAGTGG |
| Kita1-Uniq12 | 12:6711289 | C/T | GAAATGGCGAATATGGCTAA | GTCCGATTGTCACTCGACTA |
| Kita1-Uniq13 | 12:15007077 | A/T | GCTTTTAAACAAGGAGCAGC | ATATATAGCCATGGGGGACA |
| Kita_Com-2 | 4:15371211 | A/G | GCTGGAGAGGAAAGAGAGTC | TTTGCTTCTGTCCCACCTAG |
| Kita_Com-3 | 5:7683717 | C/T | CTTTTGCCTCCTCTTATTCG | GGGAGAAGATTGTGATCGTT |
| Kita_Com-6 | 8:13462537 | A/T | TGGATCTTGGTTTTTCACCT | TAGATCGGATGATGCTGAGA |
| Kita_Com-7 | 10:8598510 | A/C | ACCATGAGCAGCAAAATGCC | GAGGCTATCCGGTGGGGG |

**Table S4:** The consensus secondary reference for Nipponbare and Kitaake genome generated.

|  | Nipponbare*a* | Kitaake*b* |
| --- | --- | --- |
| Number of positions edited | 64,801 | 67,861 |
| % Retained original reference genome | 99.982 | 99.863 |

*a*Nipponbare percentage is calculated based on Nipponbare reference genome size of 430 Mb (Kawahara *et al*. 2013).

*b*Kitaake percentage is calculated based on Kitaake reference genome size of 435 Mb (Jain *et al*. 2019).

**Table S5:** Heterozygous mutation rate shared among progenies and parents and between siblings.

| Samples compared | Number of mutations | Rate per nucleotides |
| --- | --- | --- |
| Nipponbare1, Nipponbare2, Nipponbare3 | 1653 | 3.84419 X 10-6 |
| Kitaake1, Kitaake2 | 1492 | 3.4298 X 10-6 |
| Progen1, Progeny2, Progeny3 | 2063 | 4.79767 X 10-6 |

Nipponbare and Parent with Progeny 1- 3 rates are calculated based on Nipponbare reference genome size of 430 Mb (Kawahara *et al*. 2013). Kitaake rates are calculated based on Kitaake reference genome size of 435 Mb (Jain *et al*. 2019) because they were each mapped to such specific references.

**Table S6:** The summary of Sanger sequencing results.

|  | Total HVs sites | Soft masked positions | Hard masked positions | Total Sites sequenced | Well sequenced | Positive HVs out of all sequenced |
| --- | --- | --- | --- | --- | --- | --- |
| Sample-specifi: Nip1 | 16 | 8 | 8 | 8 | 7 | 7 |
| Sample-specifi: Nip2 | 13 | 1 | 12 | 12 | 8 | 8 |
| Sample-specifi: Nip3 | 11 | 3 | 8 | 8 | 2 | 2 |
| **Total for Nipponbare** | **40** | **12** | **28** | **28** | **17** | **17** |
| Sample-specifi: Kit1 | 10 | 1 | 9 | 9 | 7 | 7 |
| Sample-specifi: Kit2 | 13 | 7 | 6 | 5 | 5 | 5 |
| **Total for Kitaake** | **23** | **8** | **15** | **15** | **12** | **12** |
| Common HVs Nipponbare and Kitaake | >1000 |  |  | 25 | 13 | 13 |
| **Total for Nipponbare and Kitaake** |  |  |  | **68** | **42** | **42** |
| **Percentage** |  |  |  |  | **61.76** | **61.76 (100)** |

***Note:****When compared the well sequenced samples over all sequenced samples, there was 61.76% confirmation of positive HVs. In bracket is when considering only well sequenced samples, where there was 100% confirmation of positive HVs.*

**Table S7:** Unique parental HVs and their segregations in progeny individuals.

|  |  | Parent | | Progenies nucleotides | | | |
| --- | --- | --- | --- | --- | --- | --- | --- |
| S/N | Chromosome:pos | Heterozygosity | Alleles | Progeny 1 | Progeny 2 | Progeny 3 |
| 1 | 1:17063922 | S | C/G | CC | CC | GG |
| 2 | 1:16811365 | W | A/T | AA | TT | AA |
| 3 | 1:4470590 | Y | C/T | CC | CC | CC |
| 4 | 1:2895105 | K | T/G | TT | TT | GG |
| 5 | 1:33512331 | M | A/C | AA | CC | AA |
| 6 | 1:2895107 | R | A/G | AA | AA | GG |
| 7 | 1:11928180 | 0 | -/A | - | AA | - |
| 8 | 2:10677587 | R | G/A | GG | GG | GG |
| 9 | 2:13665982 | M | A/C | AA | CC | AA |
| 10 | 3:1253953 | S | C/G | CC | CC | GG |
| 11 | 3:13819411 | S | G/C | CC | GG | GG |
| 12 | 3:1253875 | Y | C/T | CC | CC | TT |
| 13 | 3:1254037 | Y | T/C | TT | TT | CC |
| 14 | 3:1253967 | M | A/C | AA | AA | CC |
| 15 | 3:10341344 | R | A/G | AA | AA | GG |
| 16 | 3:10138806 | 0 | C/- | CC | - | CC |
| 17 | 3:6760963 | 0 | -/C | - | - | - |
| 18 | 4:29458921 | S | C/G | CC | GG | CC |
| 19 | 4:29691997 | Y | T/C | CC | TT | TT |
| 20 | 4:29458919 | K | T/G | TT | GG | TT |
| 21 | 4:12458168 | M | A/C | AA | AA | CC |
| 22 | 4:3975235 | R | G/A | GG | GG | AA |
| 23 | 4:12599940 | M | A/C | AA | AA | AA |
| 24 | 5:8601775 | Y | T/C | CC | TT | TT |
| 25 | 5:16366853 | 0 | A/- | AA | AA | - |
| 26 | 5:18034804 | Y | T/C | TT | TT | CC |

**Table S7:** **Concluded.**

|  |  | Parent | | Progenies nucleotides | | | |
| --- | --- | --- | --- | --- | --- | --- | --- |
| S/N | Chromosome:pos | Heterozygosity | Alleles | | Progeny 1 | Progeny 2 | Progeny 3 |
| 27 | 7:18922392 | M | C/A | | CC | AA | CC |
| 28 | 7:22362250 | R | G/A | | GG | GG | GG |
| 29 | 8:12974340 | S | C/G | | CC | GG | CC |
| 30 | 8:27524471 | S | G/C | | GG | CC | GG |
| 31 | 8:15049883 | W | A/T | | TT | AA | AA |
| 32 | 8:14828710 | K | G/T | | GG | GG | TT |
| 33 | 9:8828063 | R | G/A | | GG | AA | GG |
| 34 | 9:2803909 | W | A/T | | AA | AA | TT |
| 35 | 9:21219022 | K | T/G | | TT | TT | GG |
| 36 | 9:2803910 | M | A/C | | AA | AA | CC |
| 37 | 9:2825657 | M | A/C | | AA | CC | AA |
| 38 | 9:4531159 | R | A/G | | AA | AA | GG |
| 39 | 9:7776257 | 0 | -/C | | - | - | - |
| 40 | 10:15371371 | Y | C/T | | CC | TT | CC |
| 41 | 11:27264641 | R | A/G | | GG | AA | AA |
| 42 | 11:27352452 | W | A/T | | AA | AA | TT |
| 43 | 11:27689020 | Y | C/T | | CC | CC | TT |
| 44 | 11:11331392 | K | T/G | | TT | TT | GG |
| 45 | 11:28454400 | M | C/A | | CC | CC | AA |
| 46 | 12:4258359 | R | A/G | | GG | AA | AA |
| 47 | 12:22694416 | W | T/A | | TT | AA | TT |
| 48 | 12:4258357 | Y | T/C | | CC | TT | TT |
| 49 | 12:7046647 | Y | C/T | | CC | TT | CC |
| 50 | 12:8063144 | 0 | G/- | | - | GG | GG |
| 51 | 12:4258348 | Y | T/C | | CC | TT | TT |

**Table S8:** Sample-specific HVs rates from siblings of Nipponbare, Kitaake, and Hinohikari.

| **Cultivar** | **Sample** | **HVs** | **Rate of HVs per nucleotides** |
| --- | --- | --- | --- |
|  | Nip1 | **16** | 3.72093 x 10-8 |
| Nipponbare***a*** | Nip2 | **13** | 3.02326 x 10-8 |
|  | Nip3 | **11** | 2.55814 x 10-8 |
| Kitaake***b*** | Kit1 | **13** | 2.98851 x 10-8 |
|  | Kit2 | **10** | 2.29885 x 10-8 |
| **Average HVs rate for Nipponbare and Kitaake** | | | **2.91794 x 10-8** |
|  | Progeny1 | **13** | 3.02326 x 10-8 |
| Hinohikari***c*** | Progeny2 | **12** | 2.79070 x 10-8 |
|  | Progeny3 | **19** | 4.41860 x 10-8 |
| **Average HVs rate for Hinohikari** | | | **3.41085 x 10-8** |
| **The overall average** |  |  | **3.10278 x 10-8** |

*a,c*Nipponbare, and Hinohikari rates are calculated based on Nipponbare reference genome size of 430 Mb (Kawahara *et al*. 2013).

*b*Kitaake rates are calculated based on Kitaake reference genome size of 435 Mb (Jain *et al*. 2019)

**Table S9:** List of HVs sites in Nipponbare, Kitaake siblings and Hinohikari progenies

| CLC Prediction | | | | | |  | | | Sanger validation | |
| --- | --- | --- | --- | --- | --- | --- | --- | --- | --- | --- |
| S/N | Sample | HSMs No. | Chromosome: Position | Type of zygosity | Location in the gene | | Change of protein | Mutation type and effects | | Status: Remarks | |
| 1 | Nip1 | Nip1-Uniq1 | 1:924311 | T/C | Promotor region | | TF | TF | | Pass: T | |
| 2 | Nip1-Uniq2 | 1:984665 | C/T | Os01g0117400:Exon | | ATC-ATT (Ile - Ile) | Silent | | Failed | |
| 2 | Nip1-Uniq2 | 1:984665 | C/T | Os01g0117450:Exon | | CGG-TGG(Arg-Trp) | NS | | Failed | |
| 3 | Nip1-Uniq3 | 1:12384542 | T/C | Os01g22050:Exon | | ATC-ACC (Ile-Thr) | NS | | Failed | |
| 4 | Nip1-Uniq4 | 2:24374379 | A/G | Os02g0616100:Exon | | GAA-GGA (Glu-Gly) | NS | | NE | |
| 5 | Nip1-Uniq5 | 2:24378512 | C/G | Not in genic region | | NEPS | Unknown | | Failed | |
| 6 | Nip1-Uniq6 | 3:9477005 | A/AC | Not in genic region | | NEPS | Unknown | | Failed | |
| 7 | Nip1-Uniq7 | 4:949775 | A/G | Not in genic region | | NEPS | Unknown | | Failed | |
| 8 | Nip1-Uniq8 | 5:27159839 | C/A | Os05g0547200:Intron | | NEPS | Unknown | | Pass: T | |
| 9 | Nip1-Uniq9 | 6:8603112 | C/T | Not in genic region | | NEPS | Unknown | | NE | |
| 10 | Nip1-Uniq10 | 7:21178147 | G/A | Os07g0538700:Exon | | GGG-AGG (Gly-Arg) | NS | | Pass: T | |
| 11 | Nip1-Uniq11 | 8:17354827 | G/A | Not in genic region | | NEPS | Unknown | | NE | |
| 12 | Nip1-Uniq12 | 9:3495569 | 49bp ins | Os09g0246300:Intron | | NEPS | Unknown | | Pass: T | |
| 13 | Nip1-Uniq13 | 10:2450847 | C/T | Not in genic region | | NEPS | Unknown | | NE | |
| 14 | Nip1-Uniq14 | 11:1416759 | T/C | Os11g0130900:Intron | | NEPS | Unknown | | Pass: T | |
| 15 | Nip1-Uniq15 | 11:2576407 | G/GT | Not in genic region | | NEPS | Unknown | | Pass: T | |
| 16 | Nip1-Uniq16 | 11:16412332 | C/T | Os11g28500:Intron | | NEPS | Unknown | | Pass: T | |

TF: Transcription Failure, NEPS: No effects to protein synthesis, NS: Non-synonymous, Pass: T passed the Sanger sequencing and is TRUE, NE: not examined.

**Table S9 Continued**

| CLC Prediction | | | | | | |  | | Sanger validation | |
| --- | --- | --- | --- | --- | --- | --- | --- | --- | --- | --- |
| S/N | Sample | HSM No. | Chromosome: Position | Type of zygosity | Location in the gene | Change of protein | | Mutation type and effects | | Status |
| 17 | Nip2 | Nip2-Uniq1 | 1:34917487 | A/T | Os01g0819400: Intron | NEPS | | Unknown | | Pass: T |
| 18 | Nip2-Uniq2 | 1:34917579 | C/T | Os01g0819400: Intron | NEPS | | Unknown | | Pass: T |
| 19 | Nip2-Uniq3 | 3:16876681 | G/A | Os03g29600:Exon | GAA-AAA (Glu-Lys) | | NS | | Pass: T |
| 19 | Nip2-Uniq3 | 3:16876681 | G/A | Os04g0420801:3’UTR | NEPS | | Unknown | | Pass: T |
| 20 | Nip2-Uniq4 | 4:20819741 | C/T | Os04g0420900:Exon | TTC-TTT (Phe-Phe) | | Silent | | Failed |
| 21 | Nip2-Uniq5 | 5:5179043 | G/A | Not in genic region | NEPS | | Unknown | | NE |
| 22 | Nip2-Uniq6 | 6:10582141 | G/A | Not in genic region | NEPS | | Unknown | | Failed |
| 23  24 | Nip2-Uniq7 | 8:19288594 | C/G | Not in genic region | NEPS | | Unknown | | Pass: T |
| Nip2-Uniq8 | 8:19288623 | GT/G | Not in genic region | NEPS | | Unknown | | Pass: T |
| 25 | Nip2-Uniq9 | 9:7081317 | G/A | Not in genic region | NEPS | | Unknown | | Pass: T |
| 26 | Nip2-Uniq10 | 10:1102312 | G/C | Not in genic region | NEPS | | Unknown | | Failed |
| 27 | Nip2-Uniq11 | 11:23412384 | T/C | Os11g0606500:Exon | TCT-CCT(Ser-Pro) | | NS | | Pass: T |
| 27 | Nip2-Uniq11 | 11:23412384 | T/C | Os11g0606600:Intron | NEPS | | Unknown | | Pass: T |
| 28 | Nip2-Uniq12 | 12:171934 | G/C | Promotor region | TF | | TF | | Failed |
| 29 | Nip2-Uniq13 | 12:25714599 | G/A | Not in genic region | NEPS | | Unknown | | Failed |

TF: Transcription Failure, NEPS: No effects to protein synthesis, NS: Non-synonymous, Pass: T passed the Sanger sequencing and is TRUE, NE: not examined.

**Table S9 Continued**

| CLC Prediction | | | | | |  | | Sanger validation | | |
| --- | --- | --- | --- | --- | --- | --- | --- | --- | --- | --- |
| S/N | Sample | HSM No. | Chromosome: Position | Type of zygosity | Location in the gene | Change of protein | Mutation type and effects | | Status |
| 30 | Nip3 | Nip3-Uniq1 | 1:1950170 | C/CA | Not in genic region | NEPS | Unknown | | Pass: T |
| 31 | Nip3-Uniq2 | 1:2515304 | T/C | Os01g0146350:Exon | CTA-CCA (Leu-Pro) | NS | | Pass: T |
| 32 | Nip3-Uniq3 | 3:9431155 | T/G | Not in genic region | NEPS | Unknown | | Pass: F |
| 33 | Nip3-Uniq4 | 3:20697718 | A/G | Not in genic region | NEPS | Unknown | | Failed |
| 34 | Nip3-Uniq5 | 4:9679180 | C/A | Terminator Region | GM | GM | | NE |
| 35 | Nip3-Uniq6 | 4:11340505 | C/T | Promotor region | TF | TF | | Pass: T |
| 36 | Nip3-Uniq7 | 4:11340513 | C/T | Promotor region | TF | TF | | Pass: T |
| 37 | Nip3-Uniq8 | 5:28684788 | C/T | Promotor region | TF | TF | | Failed |
| 38 | Nip3-Uniq9 | 6:25514274 | CT/C | Not in genic region | NEPS | Unknown | | Pass: T |
| 39 | Nip3-Uniq10 | 7:28921829 | C/T | Terminator Region | GM | GM | | Failed |
| 40 | Nip3-Uniq11 | 11:24888287 | A/G | Os11g41490:3’ UTR | NEPS | Unknown | | Failed |

TF: Transcription Failure, GM: Gene misbehaving, NEPS: No effects to protein synthesis, NS: Non-synonymous, Pass: T passed the Sanger sequencing and is TRUE, Pass: F passed the Sanger sequencing but is FALSE, NE: not examined.

**Table S9 Continued**

| CLC Prediction | | | | | | |  | | Sanger validation | |
| --- | --- | --- | --- | --- | --- | --- | --- | --- | --- | --- |
| S/N | Sample | HSM No. | Chromosome: Position | Type of zygosity | Location in the gene | Change of protein | | Mutation type and effects | | Status |
| 41 | Kit1 | Kita1-Uniq1 | 2:7064113 | G/A | Not in genic region | NEPS | | Unknown | | Unique sample Fail: NC |
| 42 | Kita1-Uniq2 | 2:11480722 | G/A | Not in genic region | NEPS | | Unknown | | Pass: T |
| 43 | Kita1-Uniq3 | 3:5401129 | T/A | Not in genic region | NEPS | | Unknown | | Pass: T |
| 44 | Kita1-Uniq4 | 3:29907284 | A/T | Not in genic region | NEPS | | Unknown | | Unique sample Fail: NC |
| 45 | Kita1-Uniq5 | 6:15916314 | C/T | Not in genic region | NEPS | | Unknown | | NE |
| 46 | Kita1-Uniq6 | 8:356983 | G/A | Not in genic region | NEPS | | Unknown | | Failed |
| 47 | Kita1-Uniq7 | 8:8628062 | C/T | OsKitaake08g079200:5’UTR | NEPS | | Unknown | | Failed |
| 48 | Kita1-Uniq8 | 8:21505311 | G/A | Not in genic region | NEPS | | Unknown | | NE |
| 49 | Kita1-Uniq9 | 9:4709539 | G/A | Not in genic region | NEPS | | Unknown | | NE |
| 50 | Kita1-Uniq10 | 9:10399345 | G/A | Terminator Region | GM | | GM | | Pass: T |
| 51 | Kita1-Uniq11 | 11:16265267 | G/A | Not in genic region | NEPS | | Unknown | | Failed |
| 52 | Kita1-Uniq12 | 12:6711289 | C/T | Not in genic region | NEPS | | Unknown | | Pass: T |
| 53 | Kita1-Uniq13 | 12:15007077 | A/T | OsKitaake12g118300: Exon | CGA-CGT (Arg-Arg) | | Silent | | Pass: T |

GM: Gene misbehaving, NEPS: No effects to protein synthesis, Pass: T passed the Sanger sequencing and is TRUE, NE: Not examined, NC: No comparison

**Table S9 Continued**

| CLC Prediction | | | | | | |  | | Sanger validation | | |
| --- | --- | --- | --- | --- | --- | --- | --- | --- | --- | --- | --- |
| S/N | Sample | HSM No. | Chromosome: Position | Type of zygosity | Location in the gene | Change of protein | | Mutation type and effects | | Status |
| 54 | Kit2 | Kita2-Uniq1 | 10:4344275 | C/G | Not in genic region | NEPS | | Unknown | | Pass: T |
| 55 | Kita2-Uniq2 | 10:8337385 | C/T | Not in genic region | NEPS | | Unknown | | Failed |
| 56 | Kita2-Uniq3 | 10:12305062 | A/C | Not in genic region | NEPS | | Unknown | | Pass: T |
| 57 | Kita2-Uniq4 | 11:5704806 | T/C | Terminator Region | GM | | GM | | Failed |
| 58 | Kita2-Uniq5 | 11:11481811 | C/G | Not in genic region | NEPS | | Unknown | | Failed |
| 59 | Kita2-Uniq6 | 11:11943108 | C/T | Not in genic region | NEPS | | Unknown | | NE |
| 60 | Kita2-Uniq7 | 12:20584653 | G/A | Not in genic region | NEPS | | Unknown | | NE |
| 61 | Kita2-Uniq8 | 4:28727750 | C/T | Not in genic region | NEPS | | Unknown | | NE |
| 62 | Kita2-Uniq9 | 8:16561214 | T/A | OsKitaake08g127100:Intron | NEPS | | Unknown | | Pass: T |
| 63 | Kita2-Uniq10 | 9:5184206 | C/T | Not in genic region | NEPS | | Unknown | | Failed |

GM: Gene misbehaving, NEPS: No effects to protein synthesis, Pass: T passed the Sanger sequencing and is TRUE, NE: not examined.

**Table S9 Continued**

| CLC Prediction | | | | | | |  | | Sanger validation | | |
| --- | --- | --- | --- | --- | --- | --- | --- | --- | --- | --- | --- |
| S/N | Sample | HSM No. | Chromosome: Position | Type of zygosity | Location in the gene | Change of protein | | Mutation type and effects | | Status |
| 64 | Hinohikari Progeny1 | Prog1-Uniq1 | 1:7209089 | GA/G | Os01g0229900: Terminator | GM | | GM | | NSS |
| 65 | Prog1-Uniq2 | 1:8522446 | CAT/C | Os01g0255700: Intron | NEPS | | Unknown | | NSS |
| 66 | Prog1-Uniq3 | 3:22186170 | A/C | Os03g0596400: Exon | TCA-TCC (Ser-Ser) | | Silent | | NSS |
| 67 | Prog1-Uniq4 | 3:26637934 | AC/A | Not in genic region | NEPS | | Unknown | | NSS |
| 68 | Prog1-Uniq5 | 4:31906869 | C/G | Os04g0627000: 3’ UTR | NEPS | | Unknown | | NSS |
| 69 | Prog1-Uniq6 | 6:18184914 | TC/T | Terminator Region | GM | | GM | | NSS |
| 70 | Prog1-Uniq7 | 6:30986062 | ATC/A | Os06g0727900: Intron | NEPS | | Unknown | | NSS |
| 70 | Prog1-Uniq7 | 6:30986062 | ATC/A | Os06g0727950: Intron | NEPS | | Unknown | | NSS |
| 71 | Prog1-Uniq8 | 7:16702886 | T/G | Not in genic region | NEPS | | Unknown | | NSS |
| 72 | Prog1-Uniq9 | 8:23007528 | T/G | Os08g0467600: Intron | NEPS | | Unknown | | NSS |
| 73 | Prog1-Uniq10 | 10:10440851 | T/C | Os10g20660: Exon | TGT-TGC (Cys-Cys) | | Silent | | NSS |
| 74 | Prog1-Uniq11 | 11:9094410 | T/G | Os11g0265600: Intron | NEPS | | Unknown | | NSS |
| 74 | Prog1-Uniq11 | 11:9094410 | T/G | Os11g0265650: Intron | NEPS | | Unknown | | NSS |
| 75 | Prog1-Uniq12 | 11:26660685 | TC/T | Not in genic region | NEPS | | Unknown | | NSS |
| 76 | Prog1-Uniq13 | 12:16490244 | GA/G | Not in genic region | NEPS | | Unknown | | NSS |

GM: Gene misbehaving, NSS: no Sanger sequencing, NEPS: No effects to protein synthesis.

**Table S9 Continued**

| CLC Prediction | | | | | | |  | | Sanger validation | |
| --- | --- | --- | --- | --- | --- | --- | --- | --- | --- | --- |
| S/N | Sample | HSM No. | Chromosome: Position | Type of zygosity | Location in the gene | Change of protein | | Mutation type and effects | | Status |
| 77 | Hinohikari Progeny2 | Prog2-Uniq1 | 2:26602072 | G/A | Os02g44070: Exon | GAG-GAA (Glu-Glu) | | Silent | | NSS |
| 78 | Prog2-Uniq2 | 3:19758781 | GT/G | Os03g35670: Intron | NEPS | | Unknown | | NSS |
| 79 | Prog2-Uniq3 | 3:29835730 | C/CAG | Not in genic region | NEPS | | Unknown | | NSS |
| 80 | Prog2-Uniq4 | 5:5340352 | A/T | Os05g0187100:Intron | NEPS | | Unknown | | NSS |
| 81 | Prog2-Uniq5 | 5:18653149 | G/T | Promotor region | TF | | TF | | NSS |
| 82 | Prog2-Uniq6 | 7:7180784 | C/CA | Not in genic region | NEPS | | Unknown | | NSS |
| 83 | Prog2-Uniq7 | 7:7686149 | CAT/C | Not in genic region | NEPS | | Unknown | | NSS |
| 84 | Prog2-Uniq8 | 8:11791075 | T/TA | Os08g0293300: Intron | NEPS | | Unknown | | NSS |
| 85 | Prog2-Uniq9 | 8:15776335 | T/C | Not in genic region | NEPS | | Unknown | | NSS |
| 86 | Prog2-Uniq10 | 12:8030248 | CT/C | Not in genic region | NEPS | | Unknown | | NSS |
| 87 | Prog2-Uniq11 | 12:10902297 | CA/C | Os12g0286300: Intron | NEPS | | Unknown | | NSS |
| 88 | Prog2-Uniq12 | 12:23915917 | T/TA | Os12g38890: Intron | NEPS | | Unknown | | NSS |

TF: Transcription Failure, NSS: no Sanger sequencing, NEPS: No effects to protein synthesis.

**Table S9** **Concluded.**

| CLC Prediction | | | | | | |  | | Sanger validation | |
| --- | --- | --- | --- | --- | --- | --- | --- | --- | --- | --- |
| S/N | Sample | HSM No. | Chromosome: Position | Type of zygosity | Location in the gene | Change of protein | | Mutation type and effects | | Status | |
| 89 | Hinohikari Progeny3 | Prog3-Uniq1 | 1:13272920 | T/G | Os01g0337900:Exon | GCT-GCG (Ala-Ala) | | Silent | | NSS | |
| 90 | Prog3-Uniq2 | 1:34497201 | T/G | Not in genic region | NEPS | | Unknown | | NSS | |
| 91 | Prog3-Uniq3 | 2:5323798 | A/C | Os02g0194900: Intron | NEPS | | Unknown | | NSS | |
| 92 | Prog3-Uniq4 | 2:14115907 | C/G | Os02g0439700: Exon | CCC-CCG (Pro-Pro) | | Silent | | NSS | |
| 93 | Prog3-Uniq5 | 2:14607369 | C/T | Promotor region | TF | | TF | | NSS | |
| 94 | Prog3-Uniq6 | 3:9833465 | GT/G | Os03g0285300: 5’UTR | NEPS | | Unknown | | NSS | |
| 95 | Prog3-Uniq7 | 3:9854441 | A/C | Os03g0285900: Intron | NEPS | | Unknown | | NSS | |
| 96 | Prog3-Uniq8 | 4:5547168 | A/G | Not in genic region | NEPS | | Unknown | | NSS | |
| 97 | Prog3-Uniq9 | 4:11092721 | A/AT | Os04g0268583: Intron | NEPS | | Unknown | | NSS | |
| 98 | Prog3-Uniq10 | 4:29199133 | G/A | Os04g48960: Intron | NEPS | | Unknown | | NSS | |
| 99 | Prog3-Uniq11 | 5:15028738 | T/G | Not in genic region | NEPS | | Unknown | | NSS | |
| 100 | Prog3-Uniq12 | 5:15265946 | C/T | Terminator Region | GM | | GM | | NSS | |
| 101 | Prog3-Uniq13 | 6:18255685 | T/G | Os06g31370: Exon | CTA-CGA (Leu-Gly) | | NS | | NSS | |
| 102 | Prog3-Uniq14 | 6:28494933 | GT | Promotor region | TF | | TF | | NSS | |
| 103 | Prog3-Uniq15 | 8:8209534 | G/A | Os08g0235333: Exon | AGG-AGA (Arg-Arg) | | Silent | | NSS | |
| 104 | Prog3-Uniq16 | 12:21852564 | T/G | Os12g35860: Exon | GGT-GGG (Gly-Gly) | | Silent | | NSS | |
| 105 | Prog3-Uniq17 | 12:21852567 | T/G | Os12g35860: Exon | GAT-GAG (Asp-Glu) | | NS | | NSS | |
| 106 | Prog3-Uniq18 | 12:23793577 | A/G | Not in genic region | NEPS | | Unknown | | NSS | |
| 107 | Prog3-Uniq19 | 12:25532733 | CT/C | Os12g0604800: 3’UTR | NEPS | | Unknown | | NSS | |

TF: Transcription Failure, GM: Gene misbehaving, NSS: no Sanger sequencing, NS: Non-synonymous, NEPS: No effects to protein synthesis.

**Table S10:** The chromosome distribution of the common HVs between parent and its progenies, and among progenies.

| **Chromosome** | **Number of Mutations** | **% Distribution** |
| --- | --- | --- |
| chr01 | 661 | 9.58 |
| chr02 | 798 | 11.57 |
| chr03 | 361 | 5.23 |
| chr04 | 873 | 12.65 |
| chr05 | 536 | 7.77 |
| chr06 | 490 | 7.10 |
| chr07 | 285 | 4.13 |
| chr08 | 477 | 6.91 |
| chr09 | 331 | 4.80 |
| Chr10 | 712 | 10.32 |
| Chr11 | 976 | 14.15 |
| Chr12 | 399 | 5.78 |
| **Total** | **6899** | **100** |
